# Supplementary material for: Isolation and Identification of Pigment-Producing Endophytic Fungi from the Amazonian Species Fridericia chica
Source: MDPI journal article supplement (doi:10.3390/jof10010077), 2024-01-19
Supplement: s1 [file s1]

## Supplementary Material

**Table S1.** GenBank accession numbers of sequences used in the phylogenetic analyses of multiple genes.

| Species Name                         | Specimen No. | GenBank accession no. <sup>1</sup> |             |            |             |             |
|--------------------------------------|--------------|------------------------------------|-------------|------------|-------------|-------------|
|                                      |              | ITS                                | <i>tub2</i> | <i>cal</i> | <i>tef1</i> | <i>rpb2</i> |
| <i>Aspergillus amoenus</i>           | NRRL 4838    | EF652480                           | EF652304    | EF652392   | -           | EF652216    |
| <i>Aspergillus angustatus</i>        | CBS 273.65   | EU448283                           | AY339993    | EU443984   | -           | KU867013    |
| <i>Aspergillus askiburgiensis</i>    | CCF 4716     | LN873940                           | LN873952    | LN873965   | -           | LN873984    |
| <i>Aspergillus asperescens</i>       | NRRL 4770    | EF652475                           | EF652299    | EF652387   | -           | EF652211    |
| <i>Aspergillus astellatus</i>        | NRRL 2396    | EF652446                           | EF652270    | EF652358   | -           | EF652182    |
| <i>Aspergillus aurantiobrunneus</i>  | CBS 465.65   | KF465770                           | KF499567    | -          | -           | KY006764    |
| <i>Aspergillus aurantiobrunneus</i>  | NRRL 4545    | EF652465                           | EF652289    | EF652377   | -           | -           |
| <i>Aspergillus aureolatus</i>        | NRRL 5126    | EF652501                           | EF652325    | EF652413   | -           | EF652237    |
| <i>Aspergillus austroafricanus</i>   | NRRL 233     | JQ301891                           | JN853963    | JN854025   | -           | JN853814    |
| <i>Aspergillus brasiliensis</i>      | CBS 101740   | FJ629321                           | FJ629272    | FN594543   | -           | KY006765    |
| <i>Aspergillus caespitosus</i>       | NRRL 1929    | EF652428                           | EF652252    | EF652340   | -           | EF652164    |
| <i>Aspergillus carbonarius</i>       | CBS 111.26   | NR_111094                          | GU296700    | FN594544   | -           | -           |
| <i>Aspergillus carbonarius</i>       | NRRL 369     | EF661204                           | EF661099    | EF661167   | -           | EF661068    |
| <i>Aspergillus costaricaensis</i>    | CBS 115574   | NR_103604                          | GU296699    | FN594545   | -           | -           |
| <i>Aspergillus creber</i>            | NRRL 58592   | JQ301889                           | JN853980    | JN854043   | -           | JN853832    |
| <i>Aspergillus cojetkovicii</i>      | NRRL 227     | EF652440                           | EF652264    | EF652352   | -           | EF652176    |
| <i>Aspergillus ellipticus</i>        | CBS 70779    | AY585548                           | AY585530    | -          | -           | -           |
| <i>Aspergillus eucalypticola</i>     | 53A2         | EU482439                           | EU482435    | EU482433   | -           | -           |
| <i>Aspergillus filifer</i>           | CBS 113636   | EU448277                           | -           | EU443973   | -           | KU866932    |
| <i>Aspergillus fructus</i>           | NRRL 239     | EF652449                           | EF652273    | EF652361   | -           | EF652185    |
| <i>Aspergillus griseoaurantiacus</i> | DTO:267-D8   | KJ775553                           | KJ775086    | KJ775357   | -           | -           |
| <i>Aspergillus hongkongensis</i>     | HKU49        | NR_138262                          | LC000552    | LC000565   | -           | LC000578    |
| <i>Aspergillus ibericus</i>          | NRRL 35644   | EF661200                           | EF661102    | EF661163   | -           | -           |
| <i>Aspergillus jensenii</i>          | NRRL 58600   | JQ301892                           | JN854007    | JN854046   | -           | JN853835    |
| <i>Aspergillus luchuensis</i>        | KACC 46772   | JX500081                           | JX500062    | JX500071   | -           | -           |

|                                         |                |           |          |          |          |          |
|-----------------------------------------|----------------|-----------|----------|----------|----------|----------|
| <i>Aspergillus neoniger</i>             | CBS 115656     | FJ491682  | FJ491691 | FJ491700 | -        | -        |
| <i>Aspergillus neoniger</i>             | NRRL 62634     | KC796401  | KC796361 | KC796377 | -        | -        |
| <i>Aspergillus niger</i>                | CBS 554.65     | FJ629337  | FJ629288 | FN594540 | -        | -        |
| <i>Aspergillus niger</i>                | NRRL 326       | EF661186  | EF661089 | EF661154 | -        | EF661058 |
| <i>Aspergillus oleicola</i>             | CBS 119.37     | NR_135419 | AY339996 | EU443986 | -        | KU866923 |
| <i>Aspergillus pepii</i>                | AV11051B_IX    | KU613368  | KU613371 | KU613365 | -        | -        |
| <i>Aspergillus piperis</i>              | CBS 112811     | EU821316  | FJ629303 | FN594554 | -        | -        |
| <i>Aspergillus protuberus</i>           | NRRL 3505      | EF652460  | EF652284 | EF652372 | -        | EF652196 |
| <i>Aspergillus pulverulentus</i>        | CBS 558.65     | EU821317  | HE984408 |          | -        | -        |
| <i>Aspergillus puulaauensis</i>         | NRRL 35641     | JQ301893  | JN853979 | JN854034 | -        | JN853823 |
| <i>Aspergillus sclerotiicarbonarius</i> | CBS 121057     | EU159216  | EU159229 | EU159235 | -        | MN969091 |
| <i>Aspergillus sclerotioniger</i>       | CBS 115572     | FJ629353  | FJ629304 | FN594557 | -        | -        |
| <i>Aspergillus spelunceus</i>           | NRRL 4989      | EF652490  | EF652314 | EF652402 | -        | EF652226 |
| <i>Aspergillus stellatus</i>            | NRRL 1858      | EF652426  | EF652250 | EF652338 | -        | EF652162 |
| <i>Aspergillus stellatus</i>            | NRRL 4793      | -         | EF652303 | EF652391 | -        | -        |
| <i>Aspergillus subversicolor</i>        | NRRL 58999     | JQ301894  | JN853970 | JN854010 | -        | -        |
| <i>Aspergillus sydowii</i>              | CBS 593.65     | NR_131259 | -        | EU443971 | -        | -        |
| <i>Aspergillus tabacinus</i>            | NRRL 4791      | EF652478  | EF652302 | EF652390 | -        | EF652214 |
| <i>Aspergillus tubingensis</i>          | NRRL 4875      | EF661193  | EF661086 | EF661151 | -        | EF661055 |
| <i>Aspergillus undulata</i>             | CBS 261.88     | EU448275  | -        | EU443989 | -        | KU866928 |
| <i>Aspergillus vadensis</i>             | CBS 113365     | AY585549  | AY585531 | FN594560 | -        | -        |
| <i>Aspergillus venezuelensis</i>        | CBS 868.97     | MH862679  | AY339998 | EU443977 | -        | KU866931 |
| <i>Aspergillus versicolor</i>           | ATCC 9577      | KU729039  | KU897001 |          | -        | -        |
| <i>Aspergillus versicolor</i>           | NRRL 13147     | JQ301896  | JN854003 | JN854014 | -        | JN853803 |
| <i>Aspergillus versicolor</i>           | NRRL 13150     | JQ301895  | JN853976 | JN854017 | -        | -        |
| <i>Aspergillus versicolor</i>           | NRRL 238       | EF652442  | EF652266 | EF652354 | -        | EF652178 |
| <i>Aspergillus welwitschiae</i>         | CBS 139.54     | FJ629340  | FJ629291 | KC480196 | -        | MN969100 |
| <i>Botryosphaeria agaves</i>            | MFLUCC 11-0125 | JX646791  | JX646841 | -        | JX646856 | -        |
| <i>Botryosphaeria auasmontanum</i>      | CMW25413       | KF766167  | -        | -        | -        | -        |
| <i>Botryosphaeria auasmontanum</i>      | MFLUCC 171071  | MF398863  | -        | -        | MF398915 | -        |
| <i>Botryosphaeria corticis</i>          | CBS 119047     | NR_111213 | EU673107 | -        | -        | -        |

|                                        |                |           |          |   |          |          |
|----------------------------------------|----------------|-----------|----------|---|----------|----------|
| <i>Botryosphaeria corticis</i>         | CBS 119048     | DQ299246  | MT592464 | - | -        | -        |
| <i>Botryosphaeria dolichospermatii</i> | NP1            | MH491970  | MH562327 | - | MH491974 | -        |
| <i>Botryosphaeria dothidea</i>         | CBS 115476     | KF766151  | -        | - | -        | -        |
| <i>Botryosphaeria dothidea</i>         | CMW8000        | AY236949  | AY236927 | - | AY236898 | -        |
| <i>Botryosphaeria fujianensis</i>      | NP57           | MH491973  | MH562330 | - | MH491977 | -        |
| <i>Botryosphaeria fusispora</i>        | MFLUCC 10-0098 | JX646789  | JX646839 | - | JX646854 | -        |
| <i>Botryosphaeria pseudoramosa</i>     | CERC 2001      | KX277989  | KX278198 | - | KX278094 | -        |
| <i>Botryosphaeria puerensis</i>        | CSF 6052       | MT028569  | MT028901 | - | MT028735 | -        |
| <i>Botryosphaeria qinlingensis</i>     | CFCC 52984     | MK434301  | -        | - | -        | -        |
| <i>Botryosphaeria ramosa</i>           | CMW26167       | EU144055  | -        | - | EU144070 | -        |
| <i>Botryosphaeria sharifii</i>         | IRAN 1529C     | JQ772020  | -        | - | JQ772057 | -        |
| <i>Botryosphaeria tenuispora</i>       | MUCC JPN 237   | LC585278  | LC585174 | - | LC585150 | -        |
| <i>Botryosphaeria wangensis</i>        | CERC 2298      | KX278002  | KX278211 | - | KX278107 | -        |
| <i>Botryosphaeria wangensis</i>        | CGMCC 3.18744  | NR_159555 | -        | - | -        | -        |
| <i>Cophinforma atrovirens</i>          | CBS 124934     | MH863428  | -        | - | -        | -        |
| <i>Cophinforma atrovirens</i>          | CMW22674       | FJ888473  | -        | - | FJ888456 | -        |
| <i>Cophinforma atrovirens</i>          | CMW54174       | MT934421  | MT862147 | - | MT920447 | -        |
| <i>Cophinforma atrovirens</i>          | MFLUCC 18-0241 | -         | -        | - | MK340865 | -        |
| <i>Curvularia aerea</i>                | CBS 294.61     | HE861850  | -        | - | -        | HF934812 |
| <i>Curvularia affinis</i>              | CBS 154.34     | HG778981  | -        | - | -        | HG779159 |
| <i>Curvularia alcornii</i>             | MFLUCC 10-0703 | NR_137091 | -        | - | -        | -        |
| <i>Curvularia americana</i>            | UTHSC:08-3414  | NR_146239 | -        | - | -        | HG779200 |
| <i>Curvularia asianensis</i>           | MFLUCC 10-0711 | JX256424  | -        | - | -        | -        |
| <i>Curvularia australiensis</i>        | CBS 126973     | MH864363  | -        | - | -        | -        |
| <i>Curvularia australiensis</i>        | IMI 53994      | KC424595  | -        | - | -        | -        |
| <i>Curvularia beasleyi</i>             | BRIP 10972     | NR_158442 | -        | - | -        | -        |
| <i>Curvularia beerburumensis</i>       | BRIP 12942     | NR_158443 | -        | - | -        | -        |
| <i>Curvularia buchloes</i>             | CBS 246.49     | NR_147487 | -        | - | -        | -        |
| <i>Curvularia canadensis</i>           | CBS 109239     | NR_170004 | -        | - | -        | -        |
| <i>Curvularia caricae-papayae</i>      | CBS 135941     | HG778984  | -        | - | -        | HG779162 |
| <i>Curvularia Chiangmaiensis</i>       | CPC 28829      | MF490814  | -        | - | -        | -        |

|                                      |                |           |   |   |   |          |
|--------------------------------------|----------------|-----------|---|---|---|----------|
| <i>Curvularia chlamydospora</i>      | UTHSC 07-2764  | HG779021  | - | - | - | HG779205 |
| <i>Curvularia chonburiensis</i>      | MFLUCC 16-0375 | NR_168176 | - | - | - | -        |
| <i>Curvularia coatesiae</i>          | BRIP 24261     | NR_158444 | - | - | - | -        |
| <i>Curvularia coicis</i>             | CBS 192.29     | HF934917  | - | - | - | HF934819 |
| <i>Curvularia dactylocteniiicola</i> | CPC 28810      | MF490815  | - | - | - | -        |
| <i>Curvularia eleusinicola</i>       | USJCC-0005     | MT262877  | - | - | - | -        |
| <i>Curvularia ellisii</i>            | CBS 193.62     | HF934913  | - | - | - | HF934815 |
| <i>Curvularia fallax</i>             | CBS 155.34     | MH855476  | - | - | - | -        |
| <i>Curvularia fraseriae</i>          | BRIP 64708a    | NR_185676 | - | - | - | -        |
| <i>Curvularia geniculata</i>         | CBS 187.50     | MH856584  | - | - | - | -        |
| <i>Curvularia heteropogonis</i>      | CBS 284.91     | HF934919  | - | - | - | HF934821 |
| <i>Curvularia hominis</i>            | UTHSC 09-464   | HG779011  | - | - | - | HG779191 |
| <i>Curvularia homomorpha</i>         | CBS 156.60     | MH857938  | - | - | - | -        |
| <i>Curvularia ischaemi</i>           | CBS 630.82     | HG778992  | - | - | - | HG779170 |
| <i>Curvularia joliotcurieae</i>      | BRIP 14448a    | OQ917073  | - | - | - | -        |
| <i>Curvularia kenpeggii</i>          | BRIP 14530     | NR_158447 | - | - | - | -        |
| <i>Curvularia khuzestanica</i>       | IRAN 3135C     | MH688044  | - | - | - | -        |
| <i>Curvularia kusanoi</i>            | CBS 137.29     | NR_165187 | - | - | - | LT715733 |
| <i>Curvularia lunata</i>             | CBS 730.96     | HF934911  | - | - | - | HF934813 |
| <i>Curvularia mebaldsii</i>          | BRIP 12900     | NR_172405 | - | - | - | -        |
| <i>Curvularia micrairae</i>          | BRIP 17068a    | OM421618  | - | - | - | -        |
| <i>Curvularia millisiae</i>          | BRIP 71718a    | OK661031  | - | - | - | -        |
| <i>Curvularia miyakei</i>            | CBS 197.29     | NR_147463 | - | - | - | -        |
| <i>Curvularia moringae</i>           | CPC 38873      | MW175363  | - | - | - | MW173117 |
| <i>Curvularia muehlenbeckiae</i>     | CBS 144.63     | HG779002  | - | - | - | HG779180 |
| <i>Curvularia nodosa</i>             | CPC 28800      | NR_154865 | - | - | - | -        |
| <i>Curvularia oryzae</i>             | CBS 169.53     | HF934906  | - | - | - | HF934808 |
| <i>Curvularia ovariicola</i>         | CBS 470.90     | NR_159856 | - | - | - | -        |
| <i>Curvularia patereae</i>           | CBS 198.87     | NR_169942 | - | - | - | -        |
| <i>Curvularia perotidis</i>          | CBS 350.90     | NR_169942 | - | - | - | -        |
| <i>Curvularia pisi</i>               | CBS 190.48     | NR_152502 | - | - | - | -        |

|                                     |                |           |   |          |          |          |
|-------------------------------------|----------------|-----------|---|----------|----------|----------|
| <i>Curvularia platzii</i>           | BRIP27703b     | MH414906  | - | -        | -        | -        |
| <i>Curvularia prasadii</i>          | CBS 143.64     | HG778996  | - | -        | -        | HG779174 |
| <i>Curvularia protuberata</i>       | CBS 376.65     | HG778998  | - | -        | -        | HG779176 |
| <i>Curvularia pseudobrachyspora</i> | CPC 28808      | NR_164423 | - | -        | -        | -        |
| <i>Curvularia pseudoellisii</i>     | CBS 298.80     | NR_170006 | - | -        | -        | -        |
| <i>Curvularia pseudolunata</i>      | UTHSC:09-2092  | -         | - | -        | -        | HG779207 |
| <i>Curvularia pseudoprotuberata</i> | CBS 385.69     | NR_170008 | - | -        | -        | -        |
| <i>Curvularia robusta</i>           | CBS 624.68     | HG779000  | - | -        | -        | HG779178 |
| <i>Curvularia ryleyi</i>            | CBS 349.90     | MH862215  | - | -        | -        | -        |
| <i>Curvularia senegalensis</i>      | CBS 149.71     | HG779001  | - | -        | -        | HG779179 |
| <i>Curvularia simmonsii</i>         | USJCC-0002     | MN044753  | - | -        | -        | -        |
| <i>Curvularia soli</i>              | CBS 222.96     | NR_152503 | - | -        | -        | -        |
| <i>Curvularia sorghina</i>          | BRIP 15900     | KJ415558  | - | -        | -        | -        |
| <i>Curvularia stenotaphri</i>       | BRIP 71303     | NR_175746 | - | -        | -        | -        |
| <i>Curvularia subpapendorffii</i>   | CBS 656.74     | NR_147488 | - | -        | -        | -        |
| <i>Curvularia tanzanica</i>         | IMI 507176     | NR_173195 | - | -        | -        | -        |
| <i>Curvularia tribuli</i>           | CBS 126975     | MN688825  | - | -        | -        | -        |
| <i>Curvularia tropicalis</i>        | BRIP 14834     | KJ415559  | - | -        | -        | -        |
| <i>Curvularia tsudae</i>            | ATCC 44764     | NR_147464 | - | -        | -        | -        |
| <i>Curvularia tuberculata</i>       | CBS 146.63     | HF934907  | - | -        | -        | HF934809 |
| <i>Curvularia uncinata</i>          | CBS 221.52     | HG779024  | - | -        | -        | HG779209 |
| <i>Curvularia variabilis</i>        | CPC 28815      | NR_154866 | - | -        | -        | -        |
| <i>Curvularia verruciformis</i>     | CBS 537.75     | HG779026  | - | -        | -        | HG779211 |
| <i>Curvularia warraberensis</i>     | BRIP14817      | MH414909  | - | -        | -        | -        |
| <i>Diaporthe acaciaram</i>          | CBS 138862     | KP004460  | - | -        | -        | -        |
| <i>Diaporthe acericola</i>          | MFLUCC 17-0956 | KY964224  | - | KY964137 | KY964180 | -        |
| <i>Diaporthe actinidiae</i>         | ICMP 13683     | KC145886  | - | -        | -        | -        |
| <i>Diaporthe alangii</i>            | CFCC 52556     | MH121491  | - | MH121415 | MH121533 | -        |
| <i>Diaporthe ambigua</i>            | CBS 114015     | KC343010  | - | KC343252 | KC343736 | -        |
| <i>Diaporthe angelicae</i>          | CBS 111592     | KC343027  | - | KC343269 | KC343753 | -        |
| <i>Diaporthe arctii</i>             | CBS 139280     | KJ590736  | - | KJ612133 | KJ590776 | -        |

|                                                      |                |           |   |          |          |   |
|------------------------------------------------------|----------------|-----------|---|----------|----------|---|
| <i>Diaporthe arezzoensis</i>                         | MFLU 19-2880   | MT185503  | - | -        | MT454019 | - |
| <i>Diaporthe arezzoensis</i>                         | MFLUCC 15-0127 | NR_171296 | - | -        | -        | - |
| <i>Diaporthe australpacificae</i>                    | BRIP 60163d    | OM918688  | - | -        | OM960597 | - |
| <i>Diaporthe batatas</i>                             | CBS 122.21     | KC343040  | - | KC343282 | KC343766 | - |
| <i>Diaporthe betulicola</i>                          | CFCC 51128     | KX024653  | - | KX024659 | KX024655 | - |
| <i>Diaporthe breyniae</i>                            | CBS 148910     | ON400846  | - | ON409189 | ON409188 | - |
| <i>Diaporthe camporesii</i>                          | JZB320143      | MN535309  | - | -        | MN984254 | - |
| <i>Diaporthe caryae</i>                              | CFCC 52563     | MH121498  | - | MH121422 | MH121540 | - |
| <i>Diaporthe caulivora</i>                           | CBS 127268     | KC343045  | - | KC343287 | KC343771 | - |
| <i>Diaporthe cerradensis</i> = <i>D. cf. mayteni</i> | UFMGCB4807     | KJ677018  | - | -        | KP189356 | - |
| <i>Diaporthe cerradensis</i> = <i>Diaporthe</i> sp.  | CMRP4324       | MN173195  | - | MW751651 | MT311681 | - |
| <i>Diaporthe cerradensis</i> = <i>Diaporthe</i> sp.  | CMRP4331       | MN173198  | - | MW751655 | MT311685 | - |
| <i>Diaporthe cerradensis</i> = <i>Diaporthe</i> sp.  | LGMF1616       | MG976419  | - | -        | -        | - |
| <i>Diaporthe chinensis</i>                           | MFLUCC 19-0101 | MW187324  | - | MW294199 | MW205017 | - |
| <i>Diaporthe cucurbitae</i>                          | DAOM 42078     | KM453210  | - | -        | KM453211 | - |
| <i>Diaporthe cuppatea</i>                            | CBS 117499     | KC343057  | - | KC343299 | KC343783 | - |
| <i>Diaporthe drenthii</i>                            | BRIP 66524     | MN708229  | - | -        | MN696526 | - |
| <i>Diaporthe endophytica</i>                         | CBS 133811     | KC343065  | - | KC343307 | KC343791 | - |
| <i>Diaporthe etinsidae</i>                           | BRIP 64096a    | OM918692  | - | -        | OM960601 | - |
| <i>Diaporthe fici-septicae</i>                       | MFLU 18-2588   | MW114348  | - | -        | MW192211 | - |
| <i>Diaporthe goulteri</i>                            | BRIP 55657a    | KJ197290  | - | -        | KJ197252 | - |
| <i>Diaporthe griceae</i>                             | BRIP 67014a    | OM918694  | - | -        | OM960603 | - |
| <i>Diaporthe guangdongensis</i>                      | ZHKUCC20-0014  | MT355684  | - | MT409314 | MT409338 | - |
| <i>Diaporthe gulyae</i>                              | BRIP 54025     | JF431299  | - | -        | JN645803 | - |
| <i>Diaporthe hubeiensis</i>                          | JZB320123      | MK335809  | - | MK500235 | MK523570 | - |
| <i>Diaporthe infecunda</i>                           | CBS 133812     | KC343126  | - | KC343368 | KC343852 | - |
| <i>Diaporthe kongii</i>                              | BRIP 54031     | JF431301  | - | -        | JN645797 | - |
| <i>Diaporthe longicolla</i>                          | ATCC 60325     | KJ590728  | - | KJ612124 | KJ590767 | - |
| <i>Diaporthe longispora</i>                          | CBS 194.36     | KC343135  | - | KC343377 | KC343861 | - |
| <i>Diaporthe lusitanicae</i>                         | CBS 123212     | KC343136  | - | KC343378 | KC343862 | - |
| <i>Diaporthe lusitanicae</i>                         | CBS 123213     | KC343137  | - | KC343379 | KC343863 | - |

|                                  |                |           |   |          |          |   |
|----------------------------------|----------------|-----------|---|----------|----------|---|
| <i>Diaporthe machili</i>         | SAUCC 194.111  | -         | - | -        | -        | - |
| <i>Diaporthe malorum</i>         | CAA734         | KY435638  | - | KY435658 | KY435627 | - |
| <i>Diaporthe masirevicii</i>     | BRIP 57892a    | KJ197277  | - | -        | KJ197239 | - |
| <i>Diaporthe mayteni</i>         | CBS 133185     | KC343139  | - | KC343139 | KC343865 | - |
| <i>Diaporthe melonis</i>         | CBS 507.78     | KC343141  | - | KC343383 | KC343867 | - |
| <i>Diaporthe miriciae</i>        | BRIP 54736j    | KJ197282  | - | -        | KJ197244 | - |
| <i>Diaporthe monetii</i>         | MF-Ha18-049    | MW008494  | - | MZ671939 | MW008516 | - |
| <i>Diaporthe myracrodruonis</i>  | URM7972        | MK205289  | - | MK205290 | MK213408 | - |
| <i>Diaporthe neoarctii</i>       | CBS 109490     | KC343145  | - | KC343387 | KC343871 | - |
| <i>Diaporthe novem</i>           | CBS 127270     | KC343156  | - | KC343398 | KC343882 | - |
| <i>Diaporthe novem</i>           | CBS 127271     | KR061990  | - | KC343399 | KC343883 | - |
| <i>Diaporthe oxe</i>             | CBS 133186     | KC343164  | - | KC343406 | KC343890 | - |
| <i>Diaporthe phaseolorum</i>     | AR4203         | KJ590738  | - | KJ612135 | KJ590739 | - |
| <i>Diaporthe pyracanthae</i>     | CAA483         | KY435635  | - | KY435656 | KY435625 | - |
| <i>Diaporthe racemosae</i>       | CPC 26646      | MG600223  | - | MG600219 | MG600225 | - |
| <i>Diaporthe raonikayaporum</i>  | CBS 133182     | KC343188  | - | KC343430 | KC343914 | - |
| <i>Diaporthe rosae</i>           | MFLUCC 17-2658 | MG828894  | - | MG829273 | -        | - |
| <i>Diaporthe sackstonii</i>      | BRIP 54669b    | KJ197287  | - | -        | KJ197249 | - |
| <i>Diaporthe sapindicola</i>     | CFCC 55344     | MW881507  | - | MW898943 | MW898934 | - |
| <i>Diaporthe schini</i>          | CBS 133181     | KC343191  | - | KC343433 | KC343917 | - |
| <i>Diaporthe sclerotoides</i>    | CBS 296.67     | KC343193  | - | KC343435 | KC343919 | - |
| <i>Diaporthe searlei</i>         | BRIP 66528     | MN708231  | - | -        | -        | - |
| <i>Diaporthe sojae</i>           | CBS 139282     | NR_147542 | - | -        | -        | - |
| <i>Diaporthe stewartii</i>       | CBS 193.36     | FJ889448  | - | JX197415 | GQ250324 | - |
| <i>Diaporthe tectonae</i>        | MFLUCC 12-0777 | KU712430  | - | KU749345 | KU749359 | - |
| <i>Diaporthe terebinthifolii</i> | CBS 133180     | KC343216  | - | KC343458 | KC343942 | - |
| <i>Diaporthe thunbergiicola</i>  | MFLUCC 12-0033 | KP715097  | - | -        | KP715098 | - |
| <i>Diaporthe trevorrii</i>       | BRIP 70737a    | OM918703  | - | -        | OM960612 | - |
| <i>Diaporthe tulliensis</i>      | BRIP 62248a    | KR936130  | - | -        | KR936133 | - |
| <i>Diaporthe ueckeri</i>         | CBS 139283     | NR_147543 | - | -        | -        | - |
| <i>Diaporthe vangoghii</i>       | MF-Ha18-046    | MW008492  | - | MZ671937 | MW008514 | - |

|                                    |                  |           |          |          |          |   |
|------------------------------------|------------------|-----------|----------|----------|----------|---|
| <i>Diaporthe yunnanensis</i>       | CGMCC 3.18289    | KX986796  | -        | KX999290 | KX999188 | - |
| <i>Annulohypoxylon truncatum</i>   | EKTX14006        | KX376329  | KX376352 | -        | -        | - |
| <i>Hypomontagnella barbarensis</i> | STMA 14081       | MK131720  | MK135893 | -        | -        | - |
| <i>Hypoxylon erythrostroma</i>     | MUCL 53759       | KC968910  | KC977296 | -        | -        | - |
| <i>Hypoxylon addis</i>             | MUCL 52797       | KC968931  | KC977287 | -        | -        | - |
| <i>Hypoxylon anthochroum</i>       | YBY-F117         | OP704210  | -        | -        | -        | - |
| <i>Hypoxylon aveirense</i>         | CMG 29           | MN053021  | MN066636 | -        | -        | - |
| <i>Hypoxylon aveirense</i>         | MUM 19.40        | NR_173851 | -        | -        | -        | - |
| <i>Hypoxylon baruense</i>          | UCH9545          | MN056428  | MK908142 | -        | -        | - |
| <i>Hypoxylon begae</i>             | Voucher 215(JDR) | JN660820  | AY951704 | -        | -        | - |
| <i>Hypoxylon bellicolor</i>        | UCH9543          | MN056425  | MK908139 | -        | -        | - |
| <i>Hypoxylon brevisporum</i>       | Voucher 36 (JDR) | JN660821  | AY951705 | -        | -        | - |
| <i>Hypoxylon calileguense</i>      | STMA 14059       | KU604566  | KU604579 | -        | -        | - |
| <i>Hypoxylon carneum</i>           | MUCL 54177       | KY610400  | KX271270 | -        | -        | - |
| <i>Hypoxylon cercidicola</i>       | CBS 119009       | KU683766  | KU684189 | -        | -        | - |
| <i>Hypoxylon chrysalidosporum</i>  | FCATAS 2710      | OL467295  | OL584230 | -        | -        | - |
| <i>Hypoxylon cinnabarinum</i>      | UCH9546          | MN056429  | MK908143 | -        | -        | - |
| <i>Hypoxylon damuense</i>          | FCATAS 4207      | ON075427  | ON093245 | -        | -        | - |
| <i>Hypoxylon dieckmannii</i>       | YMJ 89041203     | JN979413  | AY951713 | -        | -        | - |
| <i>Hypoxylon eurasiaticum</i>      | MUCL 57720       | NR_172358 | -        | -        | -        | - |
| <i>Hypoxylon fendleri</i>          | DSM:107927       | MK287533  | MK287571 | -        | -        | - |
| <i>Hypoxylon fendleri</i>          | UCH9552          | MN056423  | MK908137 | -        | -        | - |
| <i>Hypoxylon ferrugineum</i>       | ZT-Myc-64240     | MW489546  | -        | -        | -        | - |
| <i>Hypoxylon flavoargillaceum</i>  | STMA 14062       | KU604577  | KU159532 | -        | -        | - |
| <i>Hypoxylon fragiforme</i>        | MUCL 51264       | KC477229  | KX271282 | -        | -        | - |
| <i>Hypoxylon fraxinophilum</i>     | MUCL 54176       | KC968938  | KC977301 | -        | -        | - |
| <i>Hypoxylon fulvosulphureum</i>   | EK13010          | KP401576  | KP401584 | -        | -        | - |
| <i>Hypoxylon fuscum</i>            | CBS 113049       | NR_172215 | -        | -        | -        | - |
| <i>Hypoxylon gibriacense</i>       | MUCL 52698       | JX658523  | ON813074 | -        | -        | - |
| <i>Hypoxylon griseobrunneum</i>    | CBS 331.73       | KY610402  | KC977303 | -        | -        | - |
| <i>Hypoxylon haematostroma</i>     | MUCL 47600       | AM749924  | KC977279 | -        | -        | - |

|                                    |                |           |          |   |   |   |
|------------------------------------|----------------|-----------|----------|---|---|---|
| <i>Hypoxylon haematostroma</i>     | UCH9555        | MN056424  | MK908138 | - | - | - |
| <i>Hypoxylon hinnuleum</i>         | CBS 286.62     | MH858152  | -        | - | - | - |
| <i>Hypoxylon hinnuleum</i>         | MUCL:3621      | MK287537  | MK287575 | - | - | - |
| <i>Hypoxylon howeanum</i>          | UCH9565        | MN056427  | MK908141 | - | - | - |
| <i>Hypoxylon hypomiltum</i>        | MUCL 53312     | KC968914  | KC977298 | - | - | - |
| <i>Hypoxylon investiens</i>        | CBS 118183     | FJ185307  | FJ185298 | - | - | - |
| <i>Hypoxylon investiens</i>        | CBS 118185     | FJ185308  | FJ185299 | - | - | - |
| <i>Hypoxylon investiens</i>        | MUCL 53307     | KC477239  | KC977293 | - | - | - |
| <i>Hypoxylon isabellinum</i>       | MUCL 53308     | KC968935  | KC977295 | - | - | - |
| <i>Hypoxylon jaklitschii</i>       | CBS 138916     | NR_158468 | -        | - | - | - |
| <i>Hypoxylon jaklitschii</i>       | JF13037        | KM610290  | KM610304 | - | - | - |
| <i>Hypoxylon jecorinum</i>         | YMJ39          | JN979429  | AY951731 | - | - | - |
| <i>Hypoxylon lateripigmentum</i>   | MUCL 53304     | NG_059786 | -        | - | - | - |
| <i>Hypoxylon lignicola</i>         | MFLUCC 16-0926 | MK828609  | -        | - | - | - |
| <i>Hypoxylon lilloi</i>            | STMA 14142     | KU604574  | KU159537 | - | - | - |
| <i>Hypoxylon liviae</i>            | CBS 115282     | KC968922  | KC977265 | - | - | - |
| <i>Hypoxylon lividicolor</i>       | YMJ 70         | JN979432  | AY951734 | - | - | - |
| <i>Hypoxylon lividipigmentum</i>   | YMJ 233        | JN979433  | AY951735 | - | - | - |
| <i>Hypoxylon macrosporum</i>       | YMJ 47         | JN979434  | AY951736 | - | - | - |
| <i>Hypoxylon mangrovei</i>         | MFLU 18-0559   | MN047116  | MN077053 | - | - | - |
| <i>Hypoxylon medogense</i>         | FCATAS4061     | ON075425  | ON093243 | - | - | - |
| <i>Hypoxylon munkii</i>            | MUCL:53315     | KC968912  | KC977294 | - | - | - |
| <i>Hypoxylon musceum</i>           | MUCL:53765     | KC968926  | KC977280 | - | - | - |
| <i>Hypoxylon neosublenormandii</i> | MFLU 15-1193   | NR_155174 | -        | - | - | - |
| <i>Hypoxylon neosublenormandii</i> | MFLUCC 11-0618 | KU940157  | -        | - | - | - |
| <i>Hypoxylon ochraceum</i>         | MUCL:54625     | KC968937  | KC977300 | - | - | - |
| <i>Hypoxylon olivaceopigmentum</i> | DSM:107924     | MK287530  | MK287568 | - | - | - |
| <i>Hypoxylon papillatum</i>        | ATCC:58729     | KC968919  | KC977258 | - | - | - |
| <i>Hypoxylon perforatum</i>        | MUCL 54174     | KC968936  | KC977299 | - | - | - |
| <i>Hypoxylon petriniae</i>         | CBS 114746     | KY610405  | KX271274 | - | - | - |
| <i>Hypoxylon pilgerianum</i>       | YMJ 92042505   | JQ009310  | AY951744 | - | - | - |

|                                      |               |           |          |   |           |   |
|--------------------------------------|---------------|-----------|----------|---|-----------|---|
| <i>Hypoxylon polyporoideum</i>       | YMJ 15        | JQ009311  | AY951747 | - | -         | - |
| <i>Hypoxylon porphyreum</i>          | CBS:119022    | KC968921  | KC977264 | - | -         | - |
| <i>Hypoxylon pseudofuscum</i>        | DSM 112038    | MW367857  | MW373867 | - | -         | - |
| <i>Hypoxylon pulicicidum</i>         | CBS 122622    | JX183076  | JX183074 | - | -         | - |
| <i>Hypoxylon pulicicidum</i>         | MUCL49879     | JX183075  | JX183072 | - | -         | - |
| <i>Hypoxylon rickii</i>              | MUCL:53309    | KY610416  | KC977288 | - | -         | - |
| <i>Hypoxylon rubiginosum</i>         | MUCL 52887    | KC477232  | KY624311 | - | -         | - |
| <i>Hypoxylon samuelsii</i>           | MUCL:51843    | KC968916  | KC977286 | - | -         | - |
| <i>Hypoxylon spegazzinianum</i>      | STMA 14082    | KU604573  | KU604582 | - | -         | - |
| <i>Hypoxylon sporistriataticum</i>   | UCH9542       | MN056426  | MK908140 | - | -         | - |
| <i>Hypoxylon subgilvum</i>           | YMJ 246       | JQ009314  | AY951754 | - | -         | - |
| <i>Hypoxylon subrutiloides</i>       | F202416       | FJ185304  | FJ185281 | - | -         | - |
| <i>Hypoxylon ticinense</i>           | YMJ 313       | JQ009317  | AY951757 | - | -         | - |
| <i>Hypoxylon trugodes</i>            | MUCL 54794    | KF234422  | KF300548 | - | -         | - |
| <i>Hypoxylon ulmophilum</i>          | YMJ 350       | JQ009320  | AY951760 | - | -         | - |
| <i>Hypoxylon vogesiacum</i>          | CBS 115273    | KY610417  | KX271275 | - | -         | - |
| <i>Hypoxylon wuzhishanense</i>       | FCATAS2708    | OL467292  | OL584227 | - | -         | - |
| <i>Jackrogersella multiformis</i>    | CBS 119016    | KC477234  | KX271262 | - | -         | - |
| <i>Neofusicoccum dianense</i>        | CSF6075       | MT028605  | MT028937 | - | MT028771  | - |
| <i>Neofusicoccum hellenicum</i>      | CERC 1947     | KP217053  | KP217069 | - | KP217061  | - |
| <i>Neofusicoccum kwambonambiense</i> | CBS 123639    | MH863317  | -        | - | -         | - |
| <i>Neofusicoccum kwambonambiense</i> | CMW14023      | EU821900  | EU821840 | - | EU821870  | - |
| <i>Neofusicoccum magniconidium</i>   | CGMCC 3.20077 | NR_172859 | -        | - | -         | - |
| <i>Neofusicoccum magniconidium</i>   | CSF5876       | MT028612  | MT028944 | - | MT028778. | - |
| <i>Neofusicoccum ningerense</i>      | CGMCC 3.20078 | NR_172860 | -        | - | -         | - |
| <i>Neofusicoccum nonquaesitum</i>    | PD484         | -         | GU251823 | - | -         | - |
| <i>Neofusicoccum nonquaesitum</i>    | CBS 126655    | MH864187  | -        | - | -         | - |
| <i>Neofusicoccum occulatum</i>       | CBS 128008    | MH864743  | EU339472 | - | EU339509  | - |
| <i>Neofusicoccum podocarpi</i>       | CBS 131677    | MT587508  | MT592715 | - | MT592223  | - |
| <i>Neofusicoccum sinoeucalypti</i>   | CERC 2005     | KX278061  | KX278270 | - | KX278166  | - |
| <i>Neofusicoccum vitifusiforme</i>   | CBS 110887    | MH862869  | KX465061 | - | -         | - |

|                                       |                |           |          |   |          |          |
|---------------------------------------|----------------|-----------|----------|---|----------|----------|
| <i>Neofusicoccum yunnanense</i>       | CSF6142        | MT028667  | MT028999 | - | MT028833 | -        |
| <i>Neoscytalidium dimidiatum</i>      | CBS 499.66     | KF531820  | KF531800 | - | -        | -        |
| <i>Neoscytalidium dimidiatum</i>      | CBS 125608     | -         | MT592752 | - | MT592260 | -        |
| <i>Neoscytalidium hyalinum</i>        | CBS 145.78     | MH872880  | -        | - | -        | -        |
| <i>Neoscytalidium hyalinum</i>        | CBS 125807     | MH863770  | -        | - | -        | -        |
| <i>Neoscytalidium hyalinum</i>        | IRNHM-KZN2     | MG220374  | -        | - | MG220381 | -        |
| <i>Neoscytalidium hyalinum</i>        | IRNHM-KZN4     | MG220376  | -        | - | MG220383 | -        |
| <i>Neoscytalidium hylocereum</i>      | TSU-HP01       | -         | LC647833 | - | -        | -        |
| <i>Neoscytalidium hylocereum</i>      | PSU-HP01       | -         | LC647832 | - | -        | -        |
| <i>Neoscytalidium novaehollandiae</i> | CBS 122071     | MH863173  | MT592760 | - | -        | -        |
| <i>Neoscytalidium novaehollandiae</i> | WAC 12691      | NR_111260 | -        | - | -        | -        |
| <i>Neoscytalidium oculi</i>           | MX89           | JQ905748  | -        | - | -        | -        |
| <i>Neoscytalidium orchidacearum</i>   | MFLUCC 12-0533 | KU179865  | -        | - | -        | -        |
| <i>Pyrenopolyporus laminosus</i>      | MUCL 53305     | KC968934  | KC977292 | - | -        | -        |
| <i>Rostrophoxylon terebratum</i>      | CBS 119137     | DQ631943  | DQ840097 | - | -        | -        |
| <i>Penicillium aethiopicum</i>        | CBS 484.84     | -         | JF909958 | - | -        | JF909940 |
| <i>Penicillium allii-sativi</i>       | DTO 149A8      | -         | JX996891 | - | -        | JX996627 |
| <i>Penicillium carneum</i>            | CBS 112297     | -         | AY674386 | - | -        | JN406642 |
| <i>Penicillium chrysogenum</i>        | CBS 306.48     | -         | AY495981 | - | -        | JF909937 |
| <i>Penicillium clavigerum</i>         | CBS 25594      | -         | AY674427 | - | -        | -        |
| <i>Penicillium coccotrypicola</i>     | BRIP 59608     | -         | KM605437 | - | -        | -        |
| <i>Penicillium confertum</i>          | CBS 171.87     | -         | JF909952 | - | -        | JF909934 |
| <i>Penicillium desertorum</i>         | DTO 148I6      | -         | JX996818 | - | -        | JX996682 |
| <i>Penicillium digitatum</i>          | CBS 112082     | -         | KJ834447 | - | -        | JN121426 |
| <i>Penicillium dipodomyis</i>         | CBS 110412     | -         | JF909950 | - | -        | JX996695 |
| <i>Penicillium egyptiacum</i>         | CBS 244.32     | -         | JX996845 | - | -        | JX996714 |
| <i>Penicillium expansum</i>           | CBS 32548      | -         | AY674400 | - | -        | -        |
| <i>Penicillium flavigenum</i>         | CBS 419.89     | -         | JF909957 | - | -        | JF909939 |
| <i>Penicillium glycyrrhizicola</i>    | G4432          | -         | KF021538 | - | -        | KF021554 |
| <i>Penicillium goetzii</i>            | CBS 285.73     | -         | JX996847 | - | -        | JX996716 |
| <i>Penicillium halotolerans</i>       | DTO 148H9      | -         | JX996816 | - | -        | JX996680 |

|                                     |               |   |          |   |   |          |
|-------------------------------------|---------------|---|----------|---|---|----------|
| <i>Penicillium harmonense</i>       | CBS 412.69    | - | AY495996 | - | - | -        |
| <i>Penicillium italicum</i>         | CBS 33948     | - | AY674398 | - | - | -        |
| <i>Penicillium kewense</i>          | CBS 344.61    | - | JX996849 | - | - | JX996718 |
| <i>Penicillium lanosocoeruleum</i>  | CBS 215.30    | - | JX996843 | - | - | JX996712 |
| <i>Penicillium marinum</i>          | CBS 109550    | - | AY674392 | - | - | KU904357 |
| <i>Penicillium mediterraneum</i>    | FMR 15188     | - | LT898291 | - | - | LT899802 |
| <i>Penicillium mononematosum</i>    | CBS 172.87    | - | JF909953 | - | - | JF909935 |
| <i>Penicillium nalgiovense</i>      | CBS 352.48    | - | JX996850 | - | - | JX996719 |
| <i>Penicillium nalgiovense</i>      | NRRL 911      | - | AY371601 | - | - | -        |
| <i>Penicillium osmophilum</i>       | CBS 462.72    | - | MN969391 | - | - | JN121518 |
| <i>Penicillium paneum</i>           | CBS 101032    | - | AY674387 | - | - | KU904361 |
| <i>Penicillium persicinum</i>       | CBS 111235    | - | JF909951 | - | - | JF909933 |
| <i>Penicillium psychrosexualis</i>  | CBS 128137    | - | HQ442356 | - | - | KU904362 |
| <i>Penicillium roqueforti</i>       | CBS 221.30    | - | MN969396 | - | - | JN406611 |
| <i>Penicillium rubens</i>           | DTO 98E8      | - | JF909949 | - | - | JF909931 |
| <i>Penicillium samsonianum</i>      | AS3.15403     | - | KJ668582 | - | - | KT698899 |
| <i>Penicillium sclerotigenum</i>    | CBS 101033    | - | AY674393 | - | - | JN406652 |
| <i>Penicillium sinaicum</i>         | CBS 279.82    | - | JX996846 | - | - | JX996715 |
| <i>Penicillium tardochrysogenum</i> | DTO 149B9     | - | JX996898 | - | - | JX996634 |
| <i>Penicillium ulaiense</i>         | CBS 21092     | - | AY674408 | - | - | -        |
| <i>Penicillium xingjiangense</i>    | CGMCC 3.15274 | - | KF021544 | - | - | KF021557 |

<sup>1</sup>GenBank - Internal transcribed spacer regions (ITS),  $\beta$ -tubulin (*tub2*), calmodulin (*cal*), partial elongation factor 1-alpha gene (*tef1*), and the second largest protein subunit of DNA-directed RNA polymerase II (*rpb2*).

-: Sequence not available.

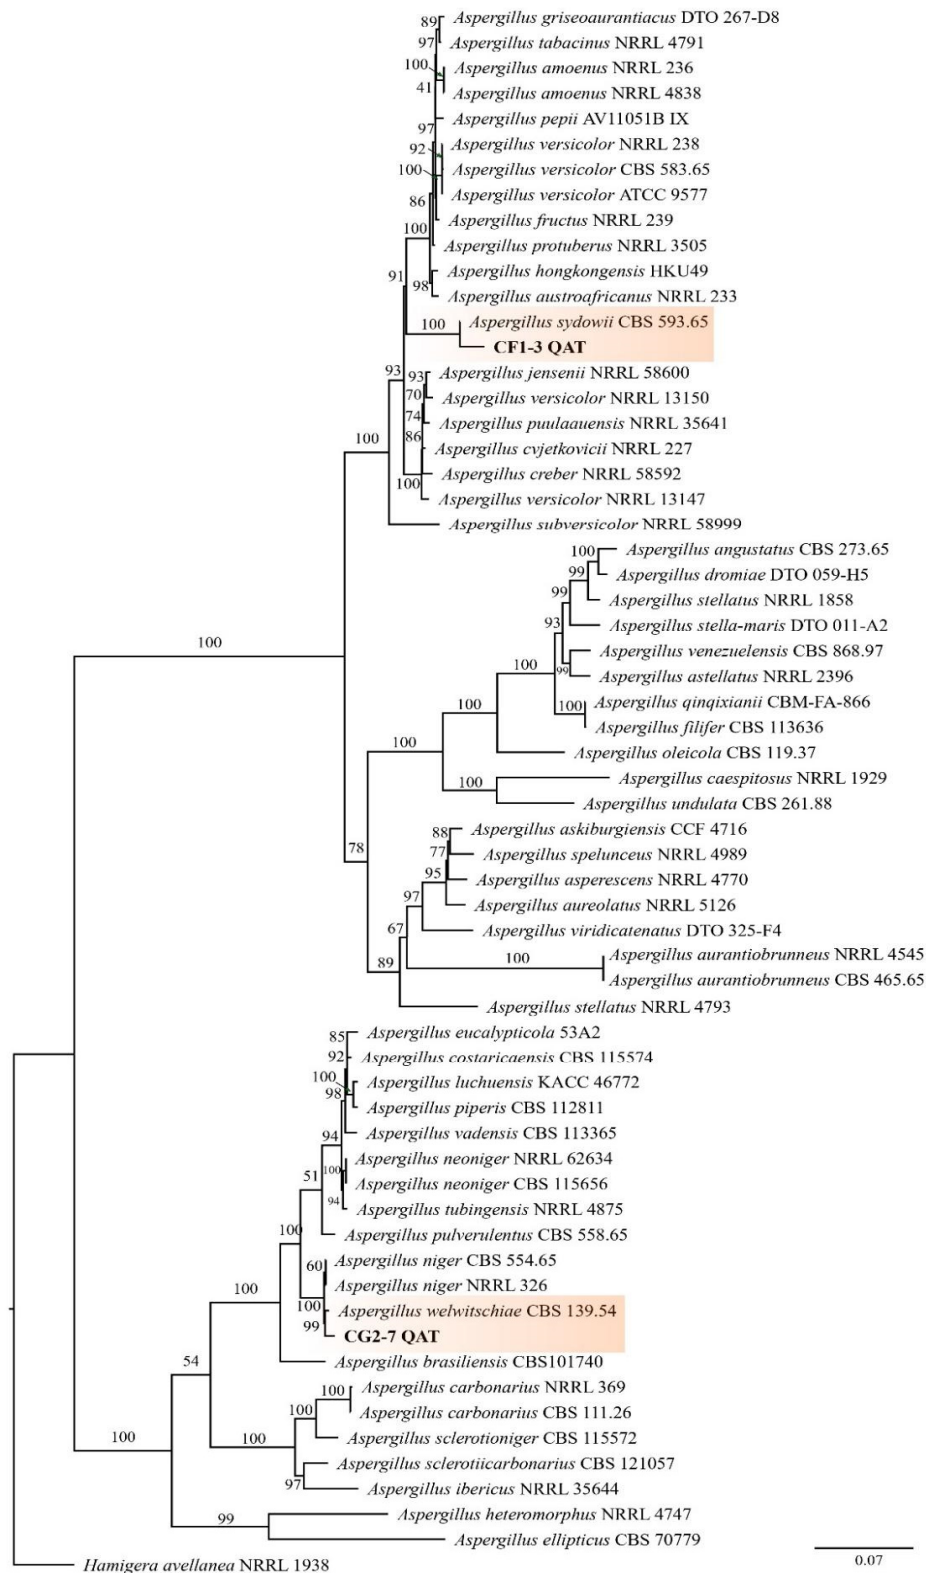

**Figure S1.** Concatenated phylogenetic analysis by Maximum Likelihood (ML) of the endophytic fungi CF1-3, isolated from *Fridericia chica* leaves, and CG2-7, isolated from *F. chica* branches, based on partial sequences of ITS, *tub2*, *cal* and *rpb2*. The scale bar of 0.07 represents the number of changes and the number indicates the bootstrap support of the branches. The sequences of the isolates studied here are highlighted in bold. The tree was rooted in *Hamigera avellanea* NRRL 1938.

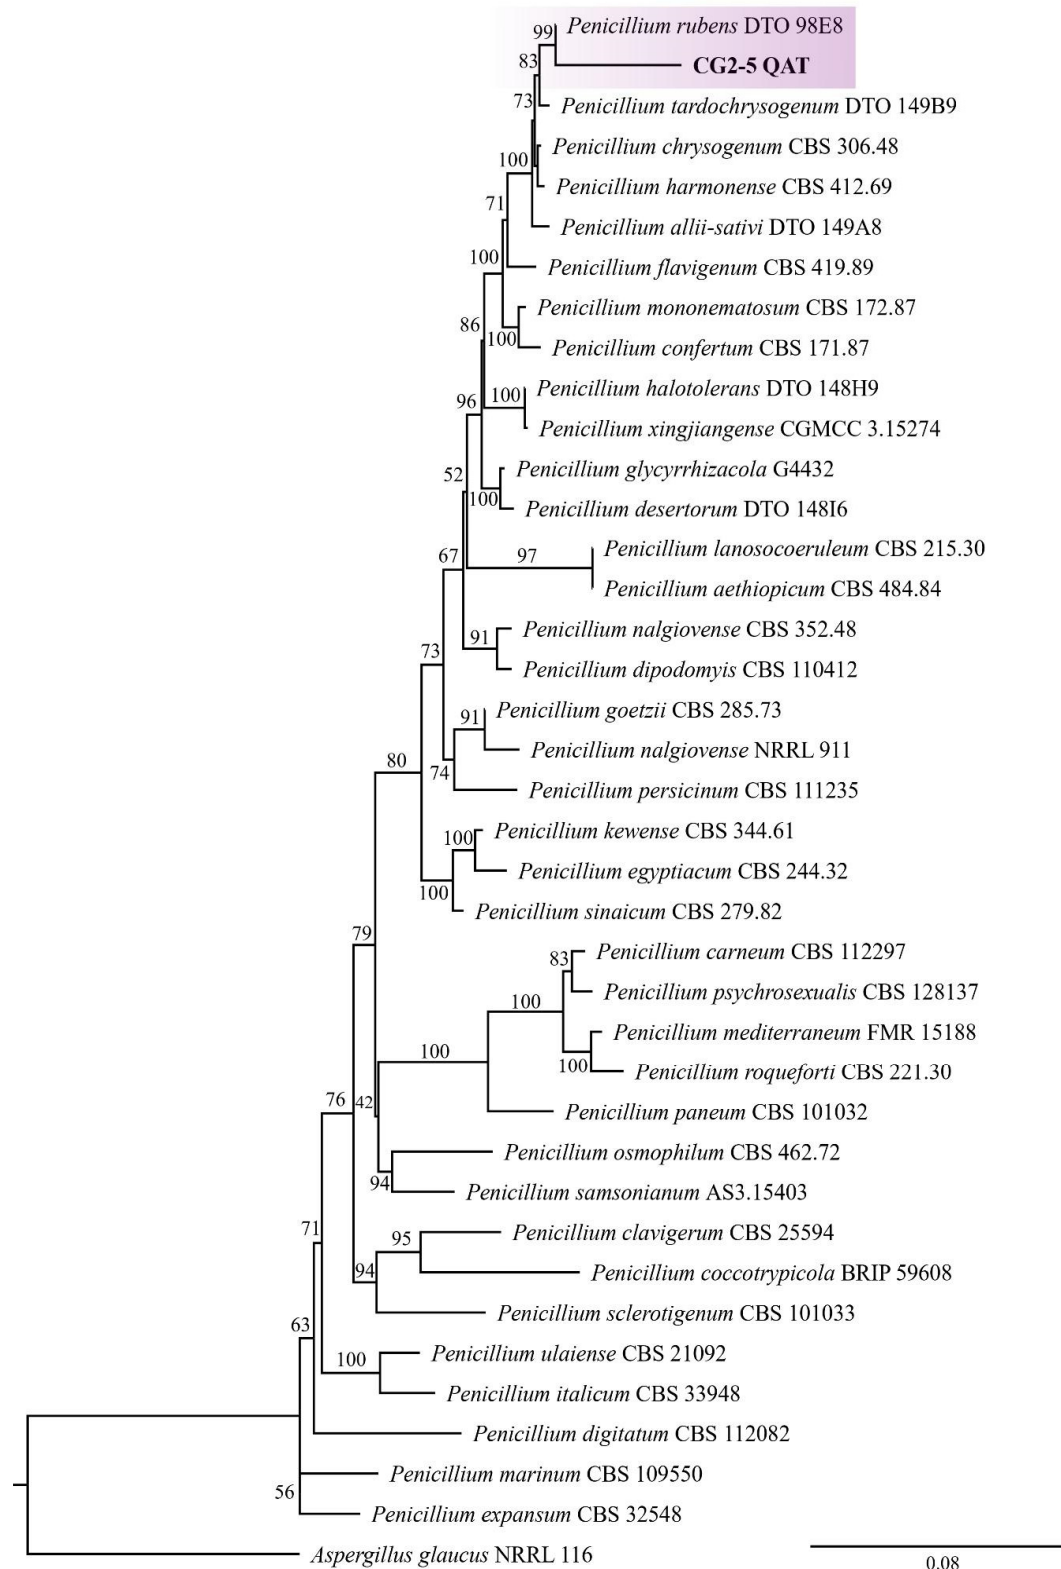

**Figure S2.** Concatenated phylogenetic analysis by Maximum Likelihood (ML) of the endophytic fungus CG2-5, isolated from *Fridericia chica* branches, based on partial sequences of *tub2* and *rpb2*. The scale bar of 0.08 represents the number of changes and the number indicates the bootstrap support of the branches. The sequences of the isolates studied here are highlighted in bold. The tree was rooted in *Aspergillus glaucus* NRRL 116.

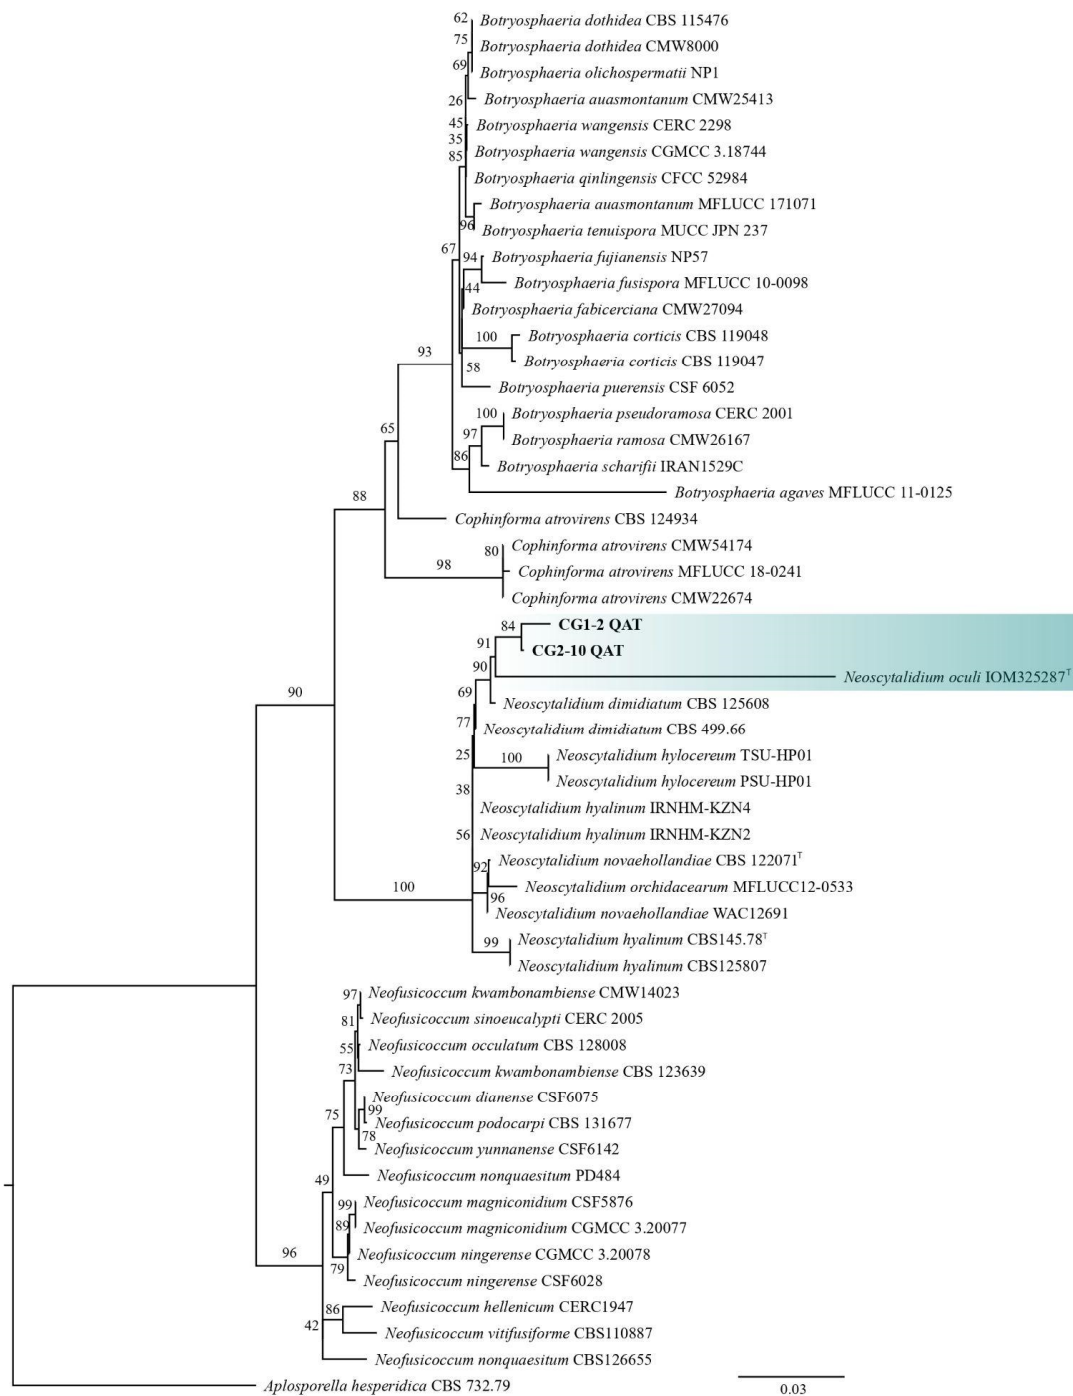

**Figure S3.** Concatenated phylogenetic analysis by Maximum Likelihood (ML) of the endophytic fungi CG1-2 and CG2-10, both isolated from branches of *Fridericia chica*, based on partial sequences of ITS, *tub2* and *tef1*. The scale bar of 0.03 represents the number of changes and the number indicates the bootstrap support of the branches. The sequences of the isolates studied here are highlighted in bold. The tree was rooted in *Aplosporella hesperidica* CBS 732.79.

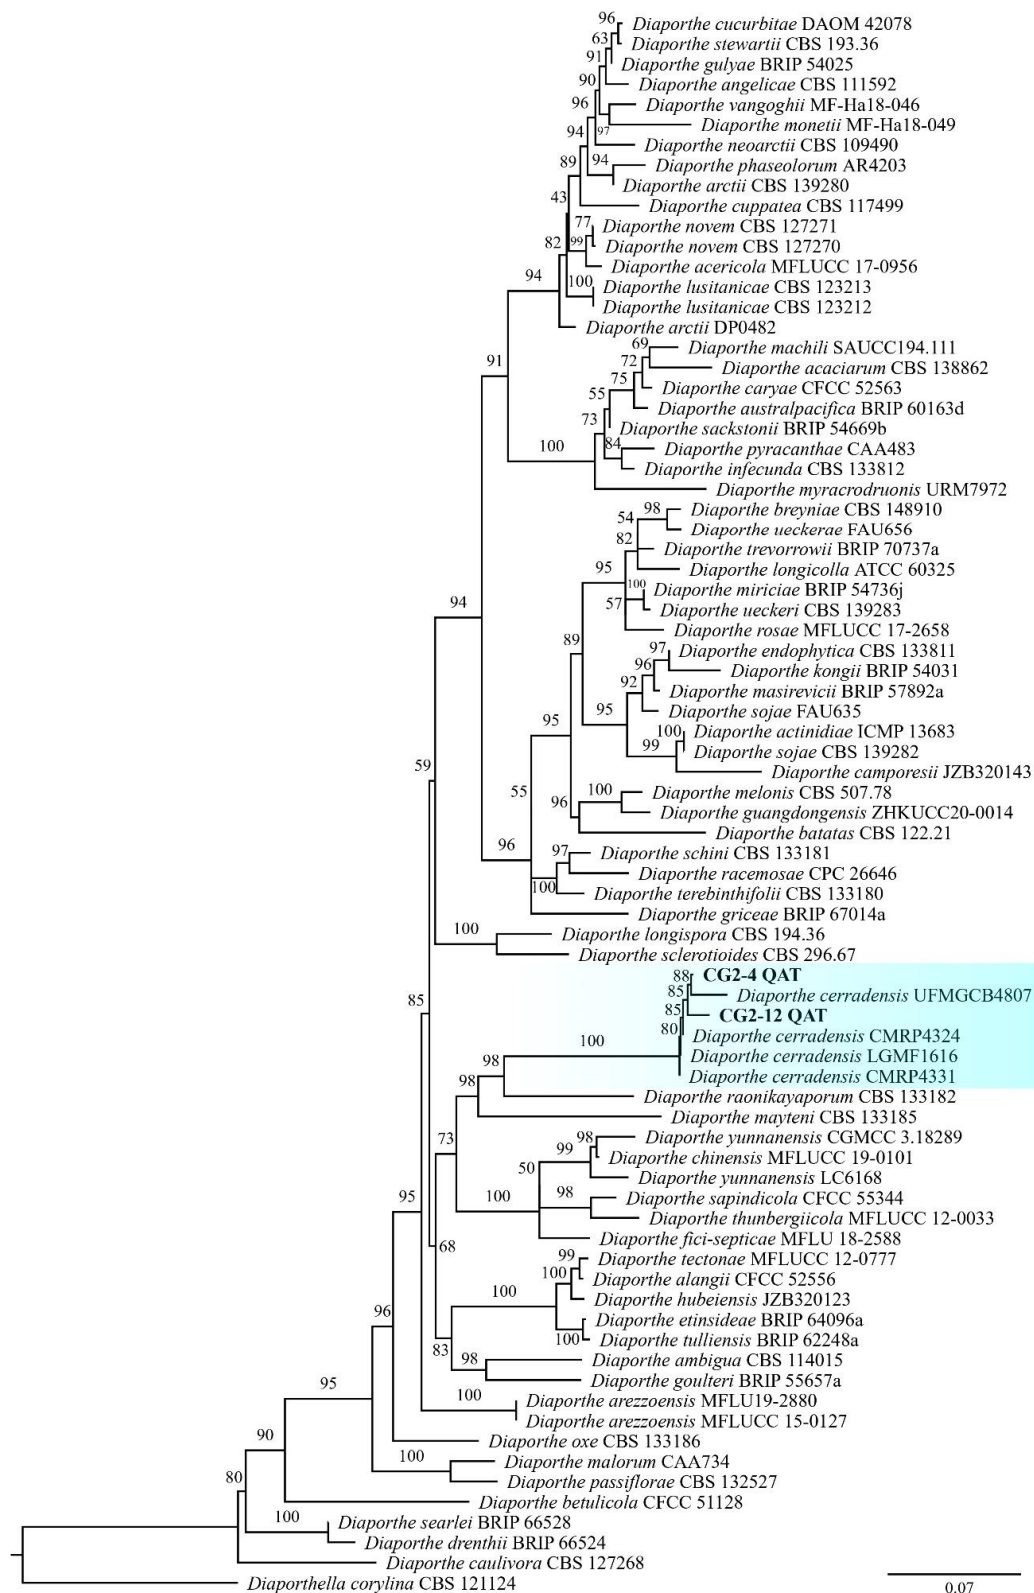

**Figure S4.** Concatenated phylogenetic analysis by Maximum Likelihood (ML) of the endophytic fungi CG2-4 and CG2-12, both isolated from branches of *Fridericia chica*, based on partial sequences of ITS, *cal* and *tef1*. The scale bar of 0.07 represents the number of changes and the number indicates the bootstrap support of the branches. The sequences of the isolates studied here are highlighted in bold. The tree was rooted in *Diaporthella corylina* CBS 121124.

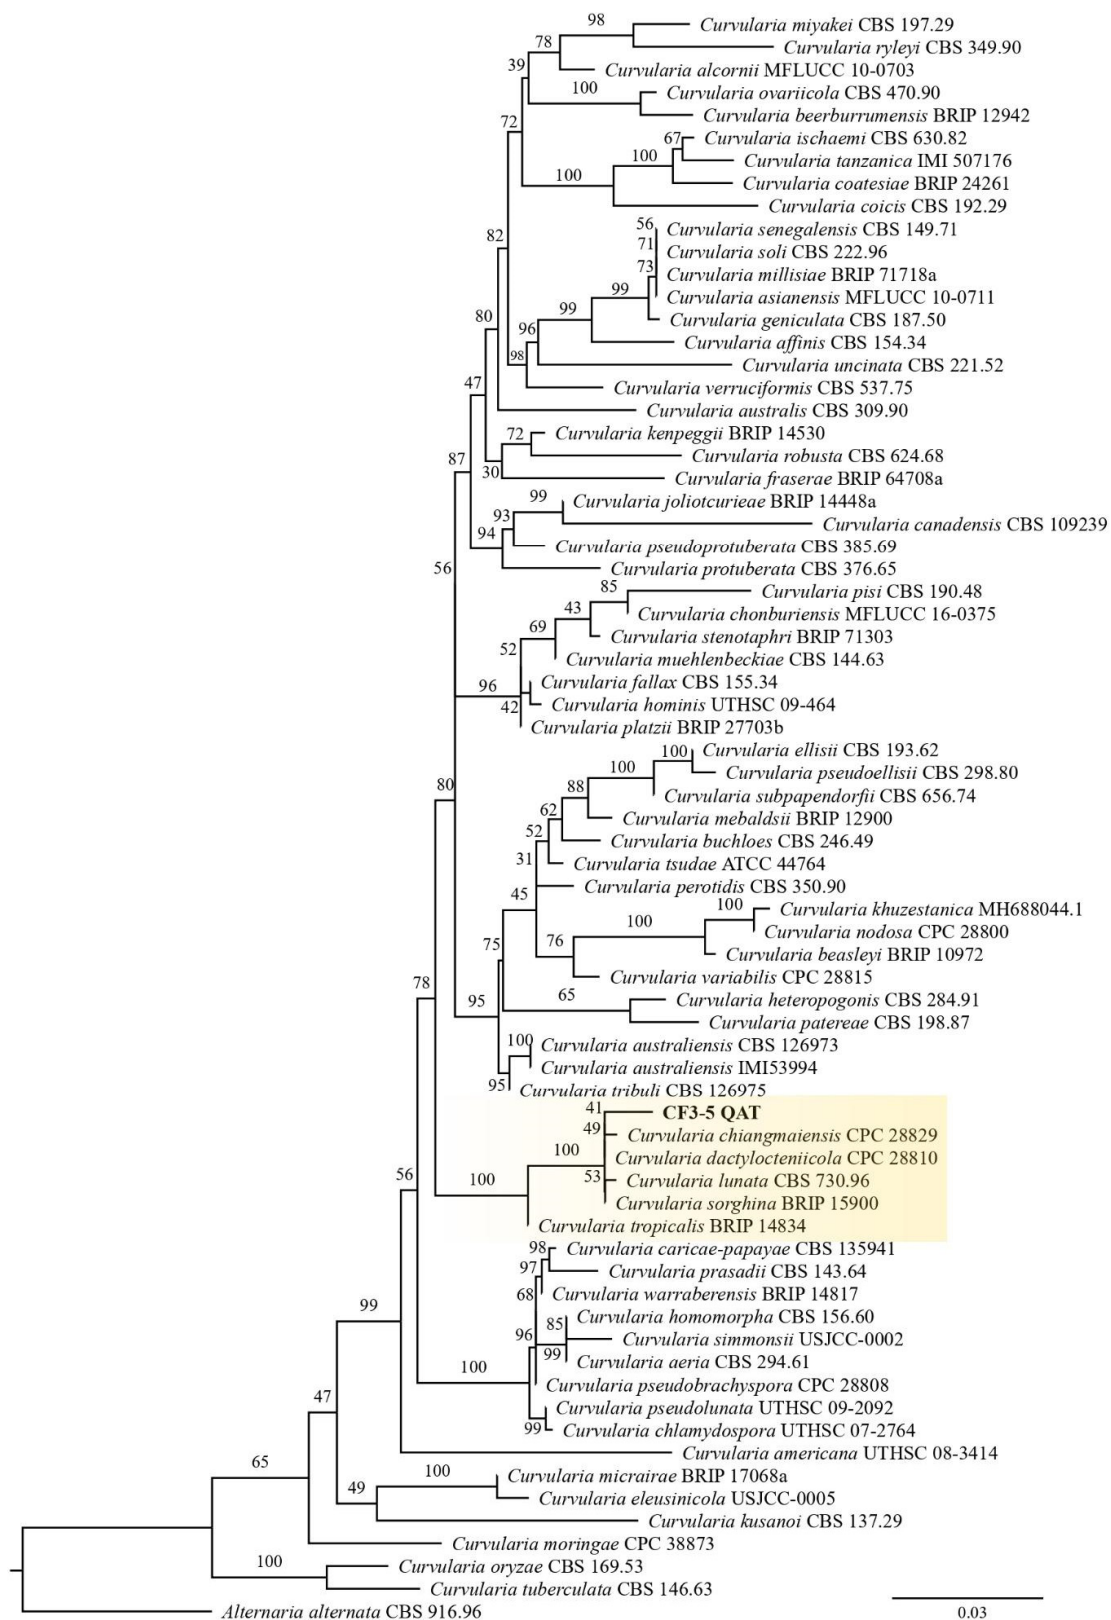

**Figure S5.** Concatenated phylogenetic analysis by Maximum Likelihood (ML) of the endophytic fungus CF3-5, isolated from the leaves of *Fridericia chica*, based on partial sequences of ITS and *rpb2*. The scale bar of 0.03 represents the number of changes and the number indicates the bootstrap support of the branches. The sequences of the isolates studied here are highlighted in bold. The tree was rooted in *Alternaria alternata* CBS 916.96.

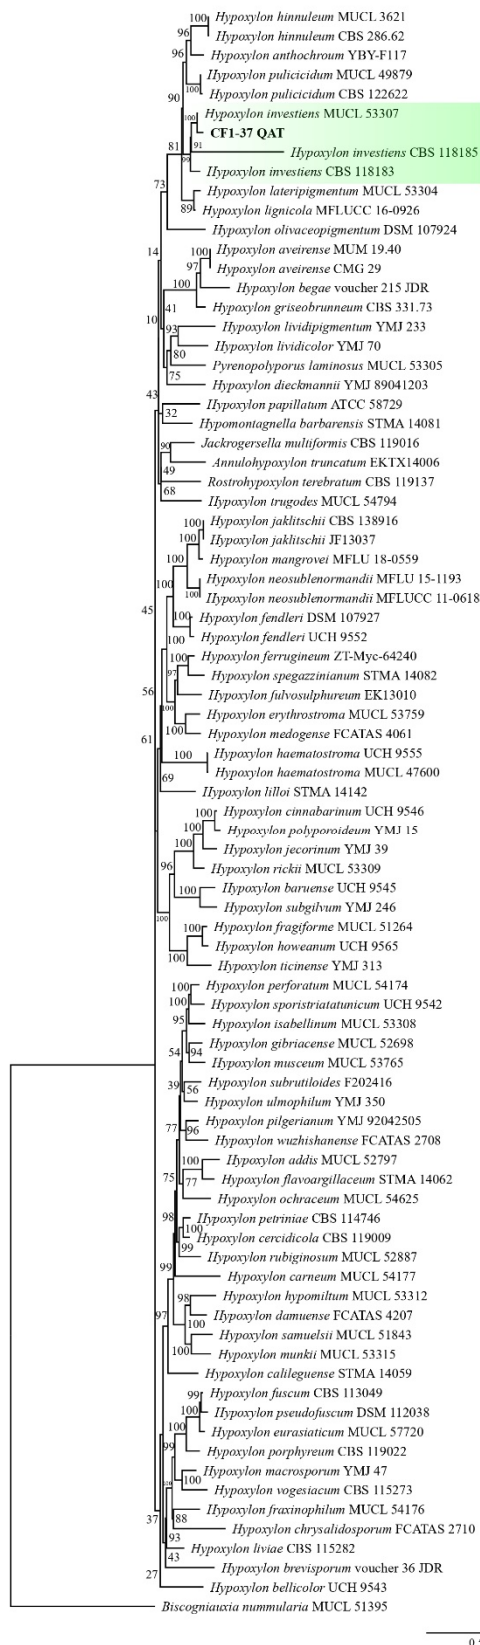

**Figure S6.** Concatenated phylogenetic analysis by Maximum Likelihood (ML) of the endophytic fungus CF1-37, isolated from the leaves of *Fridericia chica*, based on partial sequences of ITS and *tub2*. The scale bar of 0.5 represents the number of changes and the number indicates the bootstrap support of the branches. The sequences of the isolates studied here are highlighted in bold. The tree was rooted in *Biscogniauxia nummularia* MUCL 51395.
